# Supplementary material
Source: Springer Nature journal article supplement (https://www.springermedizin.de/resource/supplementary/12865_2006_89_MOESM1_ESM.pdf/9428544)

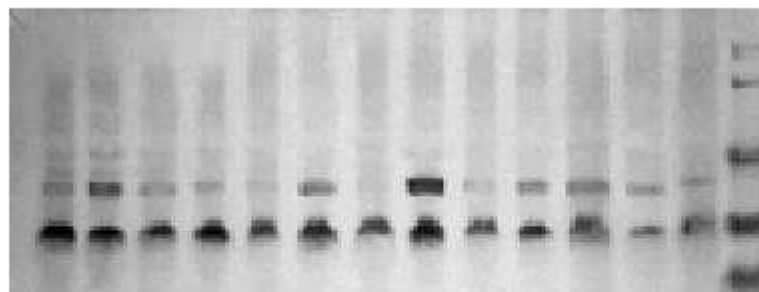

← 42 kDa  
← 32 kDa

**A**

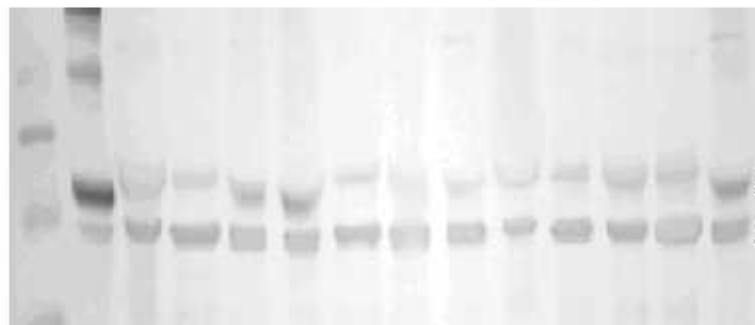

← 45 kDa  
← 42 kDa

**B**

Supplement: MOESM1 [file 9428544]
